# Supplementary material for: Exome and immune cell score analyses reveal great variation within synchronous primary colorectal cancers
Source: PubMed Central journal article supplement (PMC6734647; doi:10.1038/s41416-019-0427-4), 2019-03-21

**Supplementary Figure 1. Mutational signatures in each tumor pair.** The figure presents fractions of each signature explaining the mutations within tumors.

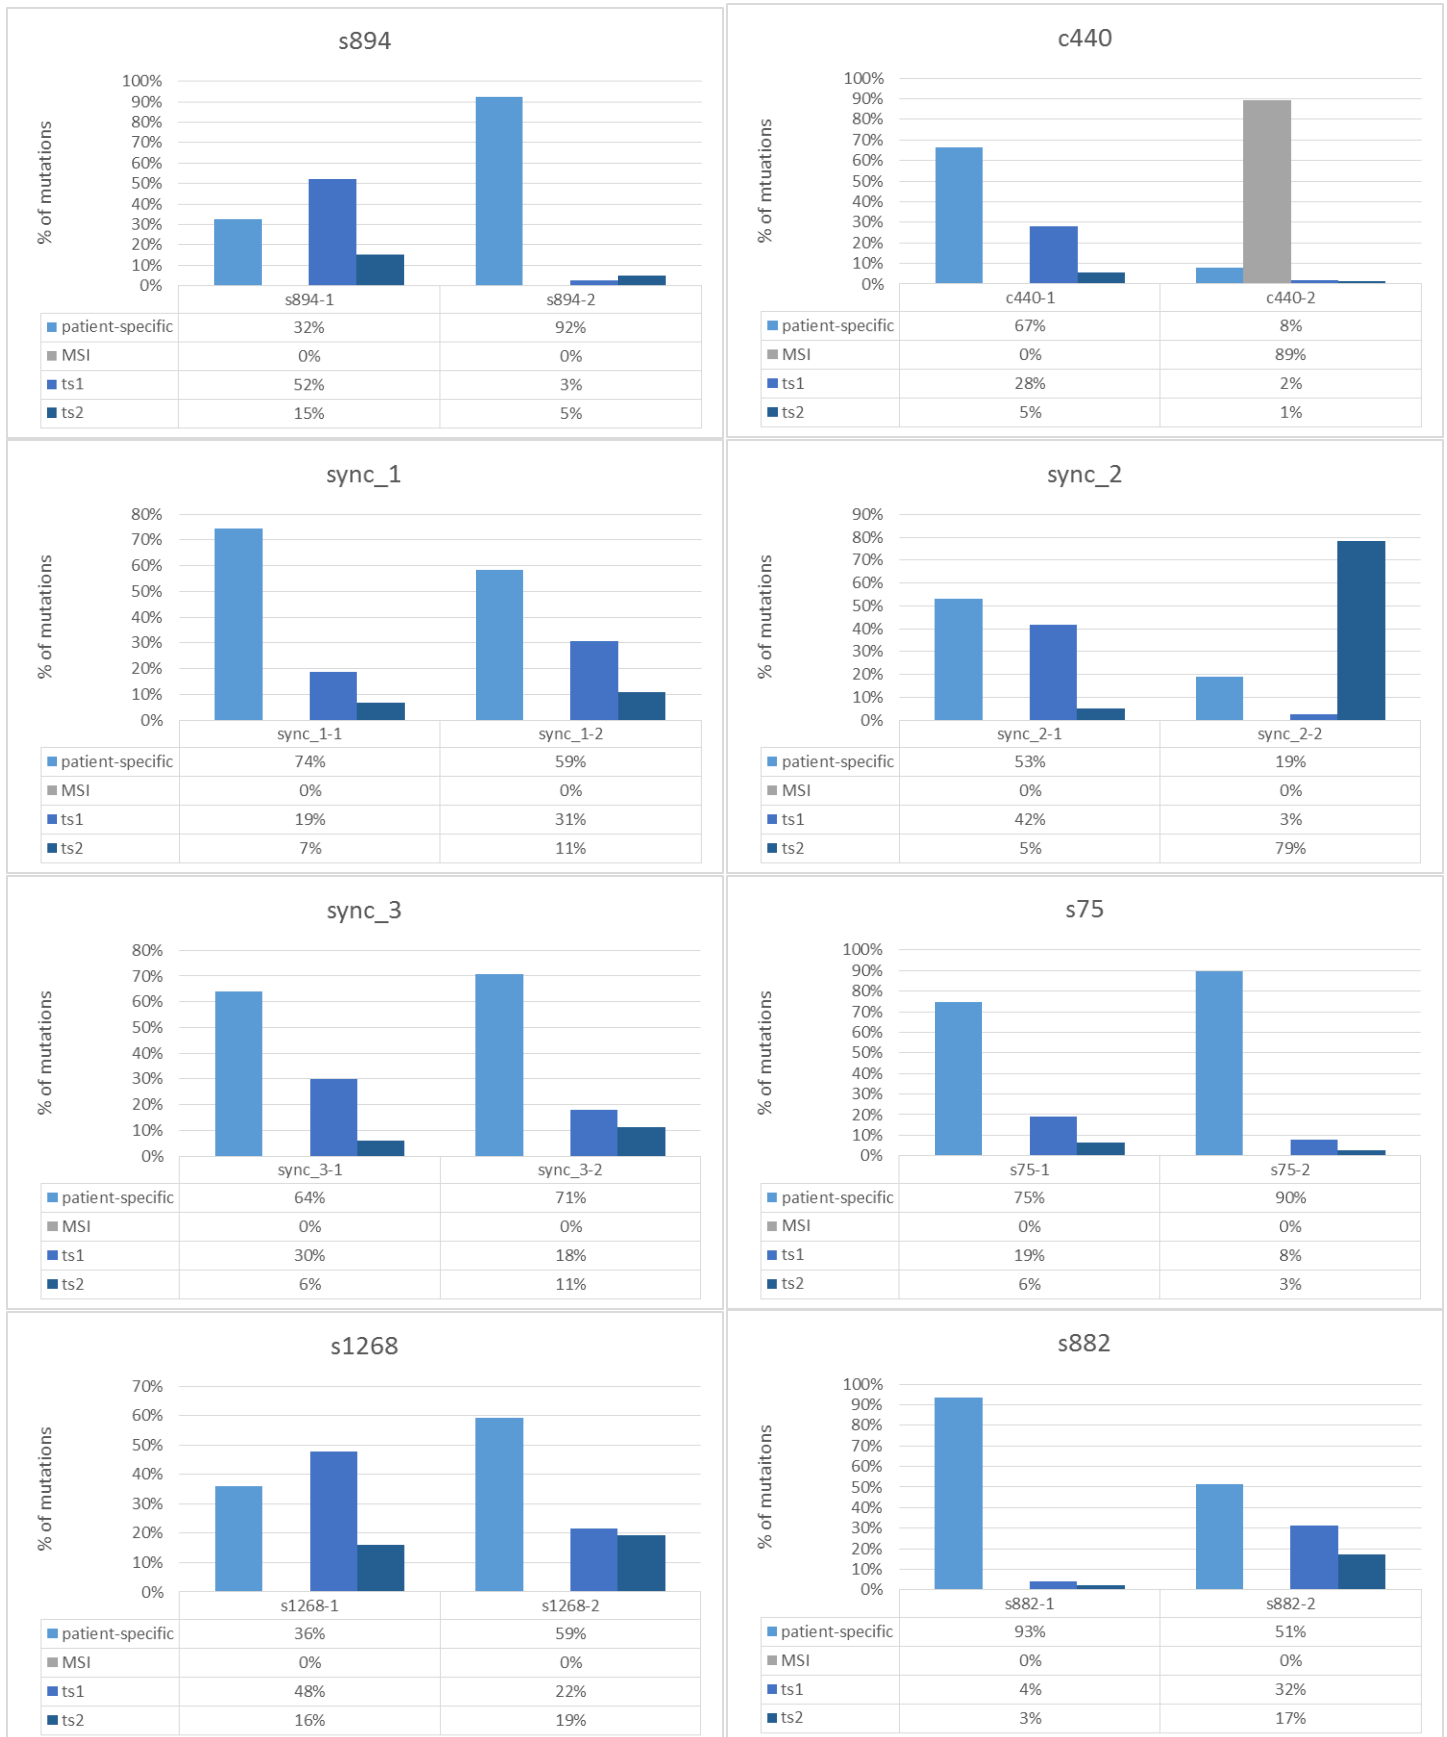

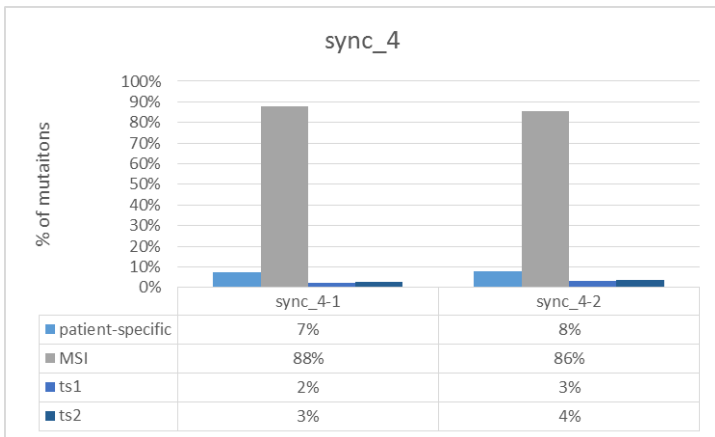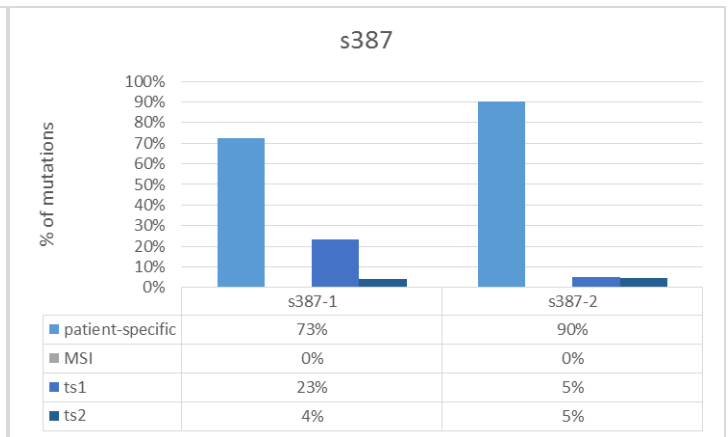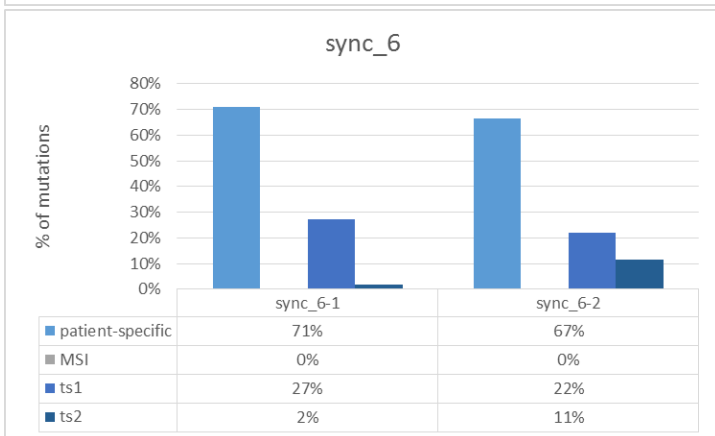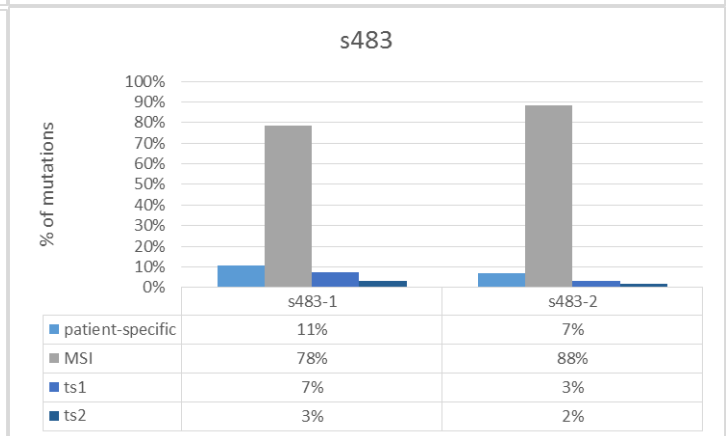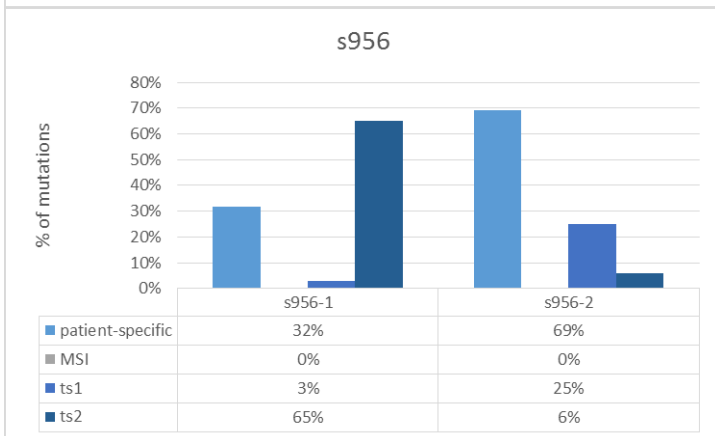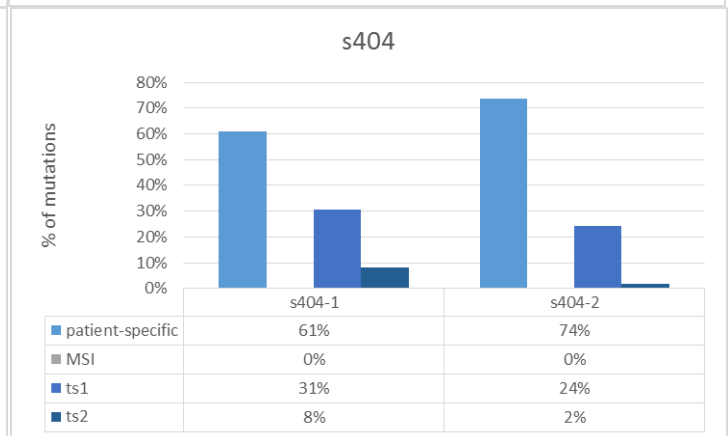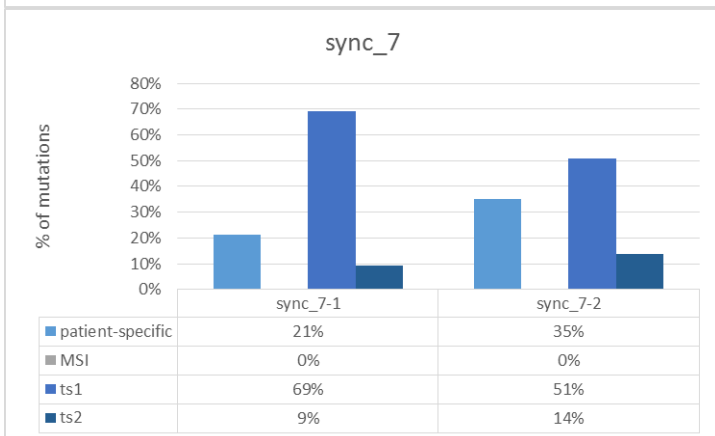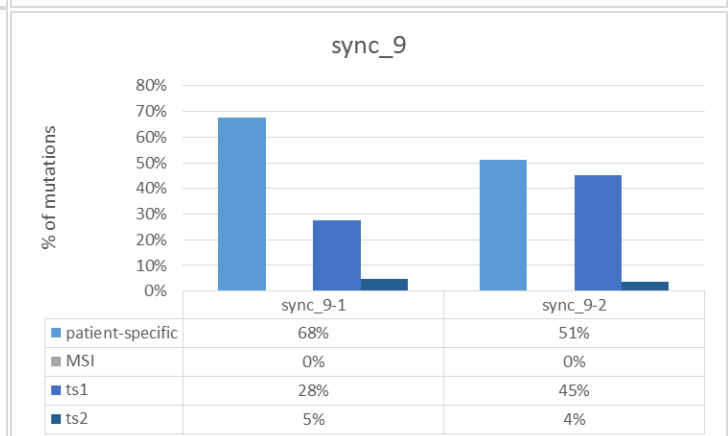

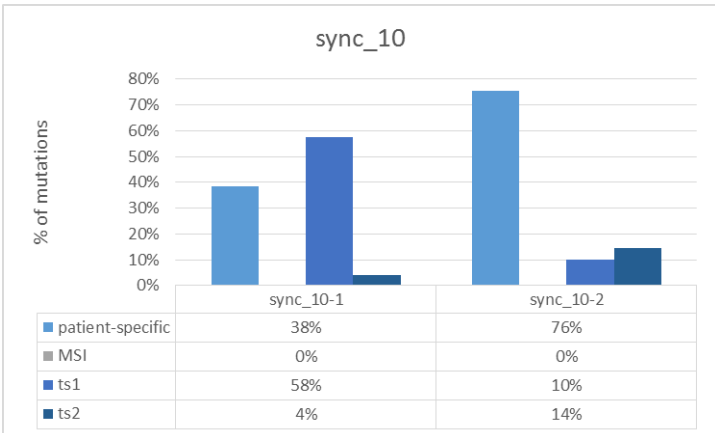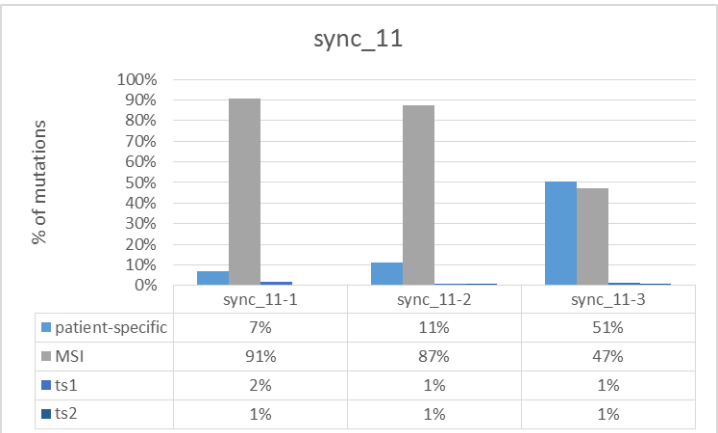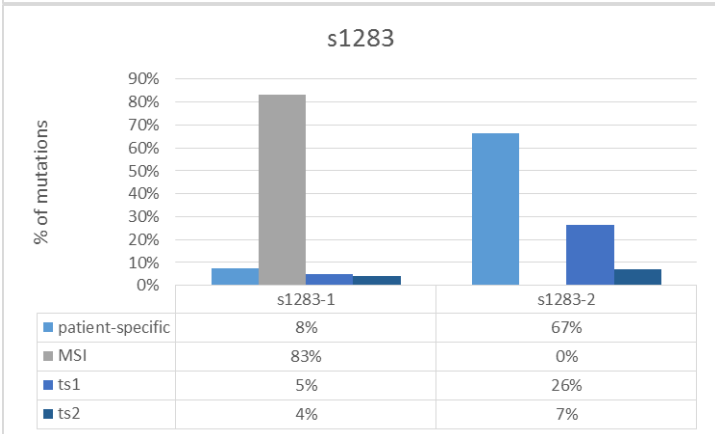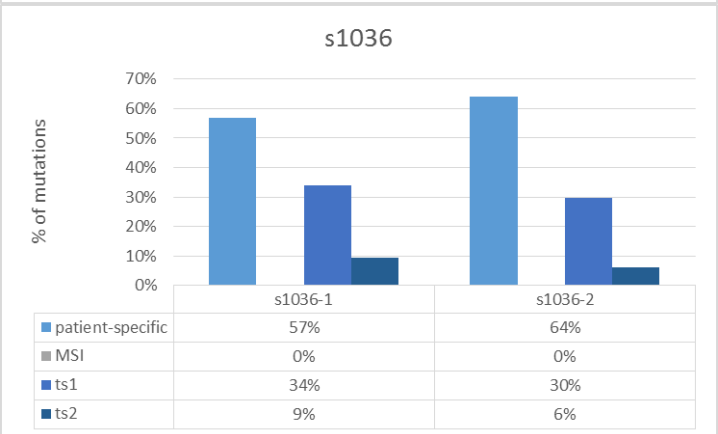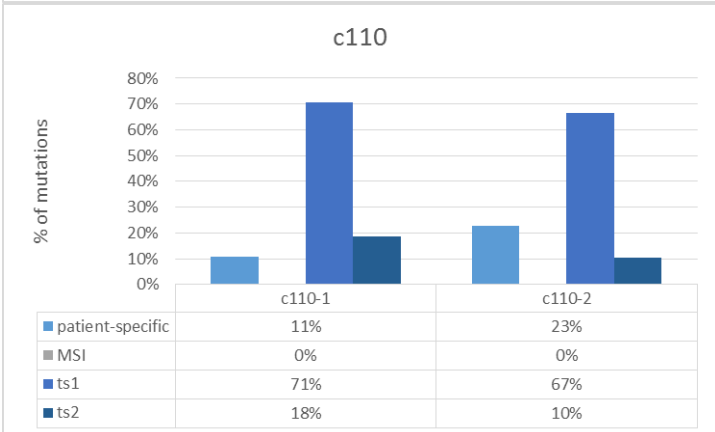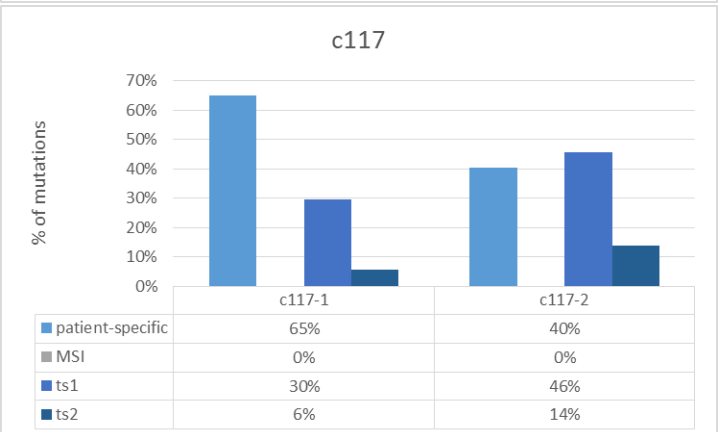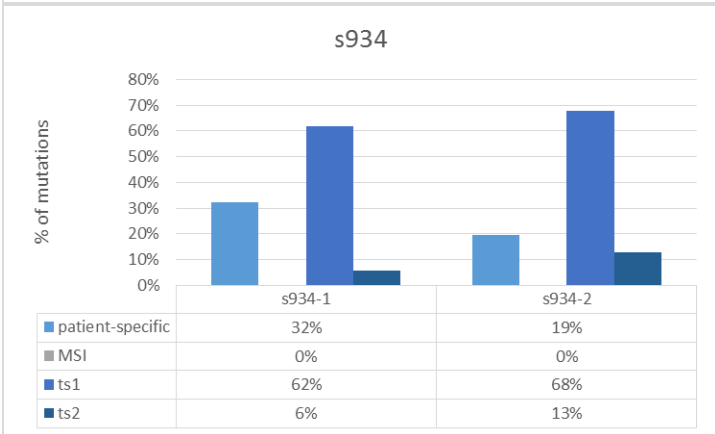

Supplement: 41416_2019_427_MOESM1_ESM.pdf [file 41416_2019_427_MOESM1_ESM.pdf]
