# Supplementary material for: Exome and immune cell score analyses reveal great variation within synchronous primary colorectal cancers
Source: PubMed Central journal article supplement (PMC6734647; doi:10.1038/s41416-019-0427-4), 2019-03-21
Supplement: 41416_2019_427_MOESM6_ESM.pdf [file 41416_2019_427_MOESM6_ESM.pdf]

**Supplementary Table 5. The altered known cancer pathways in synchronous cancers.** Number refers to the number of genes with a nonsynonymous mutation related to each pathway. The intensity of the color red reflects the number of genes mutated within each pathway in the tumor. Shared pathways (and %) column refers to the number of shared mutated pathways within the tumor pair.

|           | ATM | p53 | Wnt/ $\beta$ -catenin | ErbB | PTEN | PI3K/AKT | ERK/MAPK | TGF- $\beta$ | shared pathways | %     |
|-----------|-----|-----|-----------------------|------|------|----------|----------|--------------|-----------------|-------|
| c110-1    | 2   | 1   | 1                     |      |      | 1        | 1        |              | 5/8             | 63 %  |
| c110-2    | 1   | 1   | 2                     |      |      | 1        | 1        | 2            |                 |       |
| c117-1    | 2   | 4   | 2                     | 4    | 4    | 4        | 4        | 2            | 7/8             | 88 %  |
| c117-2    | 1   | 2   | 2                     | 2    | 2    | 2        | 2        |              |                 |       |
| c440-1    |     | 1   | 2                     |      |      |          |          | 1            | 3/8             | 38 %  |
| c440-2    | 13  | 12  | 19                    | 9    | 9    | 9        | 13       | 7            |                 |       |
| s75-1     | 2   | 3   | 3                     | 5    | 4    | 5        | 8        | 2            | 7/8             | 88 %  |
| s75-2     |     | 1   | 3                     | 2    | 4    | 3        | 3        | 2            |                 |       |
| s387-1    | 1   | 1   | 2                     | 2    | 2    | 3        | 2        | 2            | 5/8             | 63 %  |
| s387-2    | 1   | 1   | 1                     |      | 1    | 1        |          |              |                 |       |
| s404-1    | 1   |     | 1                     | 2    | 2    | 1        | 2        | 3            | 7/8             | 88 %  |
| s404-2    | 1   | 2   | 4                     | 1    | 2    | 2        | 3        | 1            |                 |       |
| s483-1    | 7   | 3   | 6                     | 2    | 6    | 4        | 6        | 5            | 8/8             | 100 % |
| s483-2    | 10  | 7   | 14                    | 6    | 9    | 11       | 14       | 12           |                 |       |
| s882-1    | 1   | 1   | 2                     |      | 1    | 2        |          |              | 5/8             | 63 %  |
| s882-2    | 3   | 3   | 3                     | 2    | 2    | 2        | 3        | 1            |                 |       |
| s894-1    | 1   | 2   | 2                     | 3    | 4    | 2        | 4        | 1            | 1/8             | 13 %  |
| s894-2    |     |     |                       |      |      |          |          | 1            |                 |       |
| s934-1    | 1   |     | 2                     | 1    | 3    | 3        | 2        | 1            | 4/8             | 50 %  |
| s934-2    | 1   | 3   | 5                     |      | 1    | 2        |          |              |                 |       |
| s956-1    | 1   | 2   | 5                     | 2    | 3    | 3        | 3        | 1            | 7/8             | 88 %  |
| s956-2    |     | 2   | 1                     | 3    | 4    | 4        | 2        | 2            |                 |       |
| s1036-1   |     | 2   | 2                     | 2    | 1    | 1        | 1        | 1            | 3/8             | 38 %  |
| s1036-2   |     |     | 3                     | 2    | 1    |          |          |              |                 |       |
| s1268-1   | 2   | 2   | 1                     |      |      | 2        | 1        |              | 5/8             | 63 %  |
| s1268-2   | 1   | 2   | 3                     | 3    | 1    | 2        | 3        | 1            |                 |       |
| s1283-1   | 8   | 11  | 14                    | 9    | 6    | 7        | 8        | 3            | 8/8             | 100 % |
| s1283-2   | 2   | 1   | 2                     | 1    | 3    | 2        | 1        | 2            |                 |       |
| sync_1-1  | 2   | 1   | 3                     | 2    | 3    | 4        | 3        | 1            | 8/8             | 100 % |
| sync_1-2  | 3   | 2   | 4                     | 3    | 1    | 2        | 3        | 2            |                 |       |
| sync_2-1  | 2   | 1   | 3                     | 3    | 2    | 2        | 2        | 3            | 8/8             | 100 % |
| sync_2-2  | 2   | 1   | 5                     | 1    | 1    | 5        | 2        | 2            |                 |       |
| sync_3-1  | 2   | 1   | 3                     |      |      | 1        | 1        | 1            | 4/8             | 50 %  |
| sync_3-2  |     |     |                       | 1    | 2    | 1        | 1        | 2            |                 |       |
| sync_4-1  | 11  | 16  | 23                    | 19   | 19   | 16       | 21       | 15           | 8/8             | 100 % |
| sync_4-2  | 11  | 11  | 13                    | 11   | 14   | 13       | 17       | 7            |                 |       |
| sync_6-1  | 1   | 2   | 2                     | 4    | 3    | 3        | 3        | 1            | 8/8             | 100 % |
| sync_6-2  | 1   | 1   | 3                     | 1    | 1    | 2        | 1        | 1            |                 |       |
| sync_7-1  |     |     | 4                     | 1    | 1    | 1        | 1        | 1            | 6/8             | 75 %  |
| sync_7-2  | 2   | 2   | 3                     | 1    | 1    | 2        | 1        | 1            |                 |       |
| sync_9-1  |     | 1   | 1                     |      |      |          |          |              | 2/8             | 25 %  |
| sync_9-2  | 2   | 4   | 2                     | 1    | 1    | 2        | 1        |              |                 |       |
| sync_10-1 | 1   | 1   | 3                     | 2    | 2    | 3        | 2        | 3            | 7/8             | 88 %  |
| sync_10-2 | 2   | 1   | 3                     | 1    | 2    | 2        | 1        |              |                 |       |
| sync_11-1 | 8   | 14  | 18                    | 6    | 9    | 7        | 12       | 9            | 5/8             | 63 %  |
| sync_11-2 | 1   | 5   | 10                    | 10   | 6    | 4        | 10       | 8            |                 |       |
| sync_11-3 |     | 2   | 4                     | 1    |      | 1        |          | 1            |                 |       |
